1 **Assessing the relationship between neural entrainment and**  
2 **altered states of consciousness induced by electronic music**

3  
4  
5 **Raquel Aparicio-Terrés<sup>1,2</sup>, Samantha López-Mochales<sup>1,2</sup>, Margarita Díaz-Andreu<sup>3,4,5</sup>,**  
6 **Carles Escera<sup>1,2,6,\*</sup>**

7  
8 <sup>1</sup> Brainlab – Cognitive Neuroscience Research Group. Department of Clinical Psychology and  
9 Psychobiology, University of Barcelona (UB), Barcelona, Spain

10 <sup>2</sup> Institute of Neurosciences, University of Barcelona (UB), Barcelona, Spain

11 <sup>3</sup> Institució Catalana de Recerca i Estudis Avançats (ICREA), Barcelona, Spain

12 <sup>4</sup> Departament d’Història i Arqueologia, University of Barcelona (UB), Barcelona, Spain

13 <sup>5</sup> Institut d’Arqueologia de la Universitat de Barcelona (IAUB), Barcelona, Spain

14 <sup>6</sup> Institut de Recerca Sant Joan de Déu (IRSJD), Esplugues de Llobregat, Spain

15

16

17

18

19

20

21

22

23 \*Correspondence concerning this article should be addressed to Carles Escera.

24 E: [cescera@ub.edu](mailto:cescera@ub.edu)

25 Full postal address: Departament de Psicocologia Clínica i Psicobiologia, Passeig Vall d’Hebron,  
26 171, Barcelona 08035, Spain

27

28 **ABSTRACT**

29 In electronic music events, the driving four-on-the-floor music appears pivotal for inducing altered  
30 states of consciousness (ASCs). While various physiological mechanisms link repetitive auditory  
31 stimuli to ASCs, entrainment—a brainwave synchronization through periodic external stimuli—  
32 has garnered primary focus. However, there are no studies systematically exploring the  
33 relationship between entrainment and ASCs. In the present study, we depart from the finding that  
34 entrainment to auditory stimuli peaks for stimulation rates around 2 Hz compared to others.  
35 Twenty participants listened to six one-minute electronic music excerpts at different tempos (1.65  
36 Hz, 2.25 Hz, and 2.85 Hz). For each excerpt, they performed cognitive tasks and reported  
37 phenomenological experiences related to ASCs through questionnaires. Brain activity was  
38 recorded with electroencephalography to assess whether a modulation in entrainment by the beat  
39 of electronic music affected objective and subjective proxies of ASCs. Our results revealed a  
40 tempo-driven entrainment modulation, peaking at 1.65 Hz. Similarly, participants' experience of  
41 unity during listening to the music was higher for the excerpts at 1.65 Hz, yet no relationship with  
42 entrainment was found. Critically, a correlation was found between entrainment and participants'  
43 reaction time. Further studies are granted to explore how individual traits, such as musical training,  
44 modulate the relationship.

45

## 46 **Introduction**

47 Every summer since 2005, thousands of people from around the world gather together in Bloom  
48 (Flanders, Belgium) to join the Tomorrowland festival. Attendees to this type of electronic dance  
49 music events (EDMEs) share the purpose of engaging in transformational experiences in the  
50 context of a diversity-friendly environment<sup>[1,2]</sup>. The dynamics of this type of events seem to  
51 facilitate their goal<sup>[1]</sup>: the dancing, drumming-like music, sleep deprivation and drug consumption  
52 (i.e., the 4D's) that characterize EDMs are key elements to produce altered states of  
53 consciousness (ASCs)<sup>[3]</sup>. ASCs might enhance the feelings of connectedness, community, and  
54 sacrality that EDMs' attendees crave<sup>[2]</sup>. However, the physiological mechanisms by which some  
55 of the 4D's facilitate a transition into an ASC remain unknown, being most of the research focused  
56 on recreational drugs, especially psychedelics<sup>[4]</sup>. In view of this research gap, we here aim to shed  
57 light on the underlying cerebral mechanisms of the 4D's "drumming" to produce ASCs.

58 The sonic environment that characterizes EDMs is reminiscent of that present during shamanic  
59 practices<sup>[5]</sup>. During shamanic rituals, intense drumming usually plays during the whole duration of  
60 these events to facilitate a shamanic trance state<sup>[6-9]</sup>, which practitioners commonly describe as  
61 going into spiritual journeys<sup>[10]</sup>. From a psychological standpoint, trance has been characterized  
62 by a narrowed awareness of the immediate surroundings and/or a selective focus on environmental  
63 stimuli<sup>[11]</sup>. In modern EDMs, the disc-jockey takes a similar guiding role to the shaman<sup>[12]</sup> and  
64 the drumming is replaced by electronic music, with an equal strong beat and repeating musical  
65 structure that is supposed to entrance the listener<sup>[13]</sup>.

66 Using repetitive stimulation to facilitate ASCs has not only been described in shamanic rituals and  
67 EDMs, but also in other different cultures and historical periods<sup>[14,15]</sup>. This cross-cultural and  
68 cross-temporal commonality suggests the existence of a biological basis that can explain how

69 being exposed to repetitive stimuli might facilitate ASCs<sup>[16]</sup>. Although many explanatory  
70 mechanisms have been proposed, neural entrainment is avowed as the most plausible one<sup>[17]</sup>, as it  
71 has been shown that brain oscillations eventually match or entrain the phase of external driving  
72 stimuli in many sensory domains<sup>[18]</sup>. This match seems to be consequence of an active brain  
73 mechanism to ensure a fine processing of the stimuli<sup>[19,20]</sup>, thus engaging the brain's endogenous  
74 activity, that is key to neural processing in a behaviorally relevant manner<sup>[21]</sup>. Additionally,  
75 research in beat perception using auditory repetitive stimulation has shown that this brain-stimulus  
76 coupling is not only limited to the auditory system, but spreads to the motor system and  
77 beyond<sup>[22,23]</sup>. Based on these findings, the drumming in shamanic rituals, or the salient and  
78 repetitive beat of electronic music in EDMs, might entrain several brain regions to frequencies  
79 that are not optimal for some cognitive operations. At the behavioral level, such a physiological  
80 configuration would translate into a temporary ASC. However, this brain-state of the mind  
81 relationship has never been experimentally measured. In this study, we aim to address this  
82 previously unaccounted association.

83 The neuroscientific research in the field of ASCs, specifically that exploring trance, frequently  
84 lack measurements of the behavioral correlates associated with these states<sup>[24-27]</sup>, leading to  
85 descriptive physiological data. These studies, although being pioneers in the field, did not employ  
86 existing tools to explore the invariant phenomenological dimensions of ASCs, such as the 11D-  
87 ASC questionnaire<sup>[28]</sup>. Moreover, the cognitive aspects of ASCs can be measured with traditional  
88 cognitive tasks used in psychological research.

89 In view of these findings, the present study will directly tackle for the first time the assumed  
90 relationship between neural entrainment and ASCs. To this aim, we draw upon the finding that  
91 neural entrainment to drum sounds and clicks reaches a peak at around 2 Hz compared to other

92 stimulation rates<sup>[29]</sup>. Noteworthy, this physiological property of the brain has never been used to  
93 explore how the magnitude of entrainment affects different aspects of human functioning and  
94 experience. Specifically, we will measure (1) participants' entrainment to the beat of naturalistic  
95 electronic music at different tempos with electroencephalography (EEG), (2) objective measures  
96 of cognitive function, namely executive function and absorption to the music at different tempos,  
97 and (3) participants' subjective experience during the music listening with three subscales of the  
98 11D-ASC. The objective and subjective measures will be employed as proxies to ASCs.

## 99 **Methods**

100 The study was approved by the Bioethics Committee of the University of Barcelona and all  
101 provisions of the Declaration of Helsinki were followed.

### 102 **Participants**

103 A total of 20 naïve, healthy volunteers were recruited from online advertisements at the University  
104 of Barcelona (Spain). All participants provided written informed consent and were paid for their  
105 participation. The general inclusion criteria comprised no history of auditory, neurological or  
106 psychiatric disorders and age between 18 and 35 years. One participant was excluded for being  
107 unable to comply with the task instructions, resulting in a final sample of 19 participants of ages  
108 ranging from 18 to 22 years (2 male and 17 female,  $M_{\text{age}} = 20$ ). In order to control for previous  
109 musical training, participants filled a standard questionnaire we use in our research designed to  
110 ascertain both the presence and duration of formal musical training. Out of the 19 participants, six  
111 individuals reported prior formal musical education, with a mean duration of 5.833 years ( $SD =$   
112 5.269).

### 113 **Stimuli**

114 One-minute-long extracts from “Endless Horizons” by Dhamika (song 1), “El despertar de Joel”  
115 by Lab’s Cloud (song 2), “Mind Expander” by Audiomatic (song 3), “Audioslave” by Vertex (song  
116 4), “Check this shit out” by AB (song 5), and “Adagio” by K Complex – Rave Remix (song 6)  
117 were used (see supplementary materials). These extracts were carefully selected to include none  
118 to minimal vocals and none to minimal beat drops (see Fig. 3a). Each song was modified with  
119 v.3.0.0 of Audacity® recording and editing software to include a fade-in and fade-out effect on  
120 the first and last seconds, respectively. The approximate tempos of the six songs were determined  
121 in a semi-automatic approach (see Section 2.4 for more details). The tempos were: 1.65 Hz or 99  
122 bpm (song 1 and 2), 2.25 Hz or 135 bpm (song 3 and 4), and 2.85 Hz or 171 bpm (song 5 and 6).  
123 The six songs could therefore be classified into three tempos: 1.65 Hz, 2.25 Hz and 2.85 Hz. The  
124 sound intensity levels were intentionally not equalized across the song extracts because doing so  
125 would not effectively address the natural differences in the volume of the beat among the different  
126 songs. However, all the extracts were played at the same intensity level.

## 127 **Procedure**

128 Participants sat comfortably in a soundproof Faraday chamber with a screen in front of them,  
129 headphones on, a mouse in their dominant hand, and a touch sensitive tablet on their legs. A  
130 graphical representation of the sequence of an example trial can be seen in Fig. 1. At the beginning  
131 of each trial, participants were presented with a 0.5-second-long pure tone indicating the start of a  
132 10 s silence period. Immediately after, one of the six one-minute-long songs was played at 80 dBs.  
133 In total, there were three trials for each song randomized across three blocks for each participant.  
134 When the music stopped, participants had to left-click on the mouse as soon as they realized the  
135 music was over. After 10 s, a 0.5-second-long pure tone warned participants that the go/no-go task  
136 was about to start. Then, the screen displayed a countdown starting from three and framed by a

137 visual shape that could either be a square or a diamond shape. Once the countdown reached one,  
138 150 shapes (either a square or a diamond) were presented sequentially in the screen, following the  
139 same timing constraints as in a previous study<sup>[30]</sup>. Specifically, prior to the presentation of each  
140 shape, a fixation cross was presented for 200 ms + 0-300 ms jitter. Following the fixation cross,  
141 each shape was displayed up to 700 ms or until response. If the shape in the screen matched the  
142 one presented during the countdown, participants had to left-click on the mouse (go stimuli). If  
143 not, they had to refer from clicking (no-go stimuli). The shape of the go-stimuli was randomized  
144 for each participant. The probability of a go-stimuli appearing was fixed in each trial to 75 % to  
145 maximize the number of false alarms (i.e., responding when a no-go stimulus is presented)<sup>[31]</sup>.  
146 When the go/no-go task was over, participants used the touch-sensitive tablet to fill from 0 to 10  
147 the items presented in a spider chart of three subscales of the 11D-ASC<sup>[28]</sup>, namely Experience of  
148 unity, Spiritual experience, and Disembodiment. Following a similar procedure to a previous  
149 study<sup>[32]</sup>, the ratings were obtained using three customizable spider charts, one for each subscale,  
150 with as many radii as items (Fig. 2). A fixation cross in the center of the screen was present during  
151 the whole duration of the trials. Previously to the start of the experiment, all participants conducted  
152 three practice trials, in which generic elevator music was used as stimuli, to get familiarized with  
153 the tasks. EEG was recorded during the whole duration of the trials.

#### 154 **Sound pattern analysis**

155 The sound pattern analysis was conducted by using the Fieldtrip v.20211020 toolbox<sup>[33]</sup> and  
156 Matlab v.2021a. The frequency at which entrainment was expected to be elicited in the recorded  
157 EEG signals (i.e., the songs' beat frequency) was determined in a semi-automatic approach. First,  
158 an experienced musician tapped along to each 1-minute song extract on a keyboard, while a custom  
159 Matlab program counted the taps and extracted a first approximated beat frequency (i.e., the

160 number of taps per second). The second step involved transforming the songs' waveforms to the  
161 frequency dimension. To this aim, each song was cut from +1 s to +59 s relative to the onset of  
162 the musical extract. The first and last seconds of the songs were left out of the analysis to exclude  
163 the fade-in and fade-out effects of the songs. The envelopes were extracted using a Hilbert  
164 transform, this is, by obtaining the absolute value of the complex-valued analytic signal using the  
165 functions 'abs' and 'hilbert' in Matlab.

166 Considering the non-stationarities inherent in our naturalistic music stimulation, the envelopes  
167 were transformed into the frequency domain using Welch's method with a window length of 10  
168 seconds and a 90% overlap, employing a Hanning taper. This transformation was performed using  
169 the 'mtmconvolv' function implemented in Fieldtrip and resulted in a frequency spectrum with a  
170 frequency resolution of 0.1 Hz. The exact beat frequency was determined as the spectral  
171 amplitude's peak within a range from -0.5 to +0.5 Hz from the first approximated beat frequency.  
172 To explore the temporal dynamics of neural entrainment, the exact beat frequency was measured  
173 across time in a separate analysis. The 58-second-long waveforms were segmented into 10 s  
174 windows with a 90% overlap and subsequently transformed into the frequency domain with a  
175 Hanning taper, as implemented in Fieldtrip's function 'mtmconvolv', yielding frequency  
176 spectrums with a frequency resolution of 0.1 Hz. The exact beat frequency for each window was  
177 determined as the frequency bin with the maximum spectral amplitude within a range from -0.5 to  
178 +0.5 Hz from the approximated beat frequency.

179 Differences in the spectral amplitude of the beat frequencies between songs were expected and  
180 indeed confirmed after the frequency transformations (Fig. 3b). These differences might be  
181 explained by there being a different number of beats for each musical extract, which might affect  
182 the measures of neural entrainment in an unknown way. To account for these differences, we



183 implemented a normalization procedure. Global entrainment and entrainment across time were  
184 measured as a multi-harmonic signal-to-noise ratio (SNR) of the spectral amplitudes of the EEG  
185 responses at the beat and significant harmonic frequencies (see section 2.6. EEG data processing  
186 and analysis). To normalize these measures, we quantified for each song the multi-harmonic SNR  
187 of the spectral amplitudes of the whole waveforms at the beat and significant harmonic  
188 frequencies. Subsequently, we computed the ratio between the SNR of the EEG responses and the  
189 SNR of the corresponding waveforms. To compute the multi-harmonic SNR of the waveforms,  
190 we first summed the spectral amplitudes at the beat frequency ( $F_0$ ), first harmonic ( $2F_0$ ), and  
191 second harmonic ( $3F_0$ ) frequency bins (i.e., signal) and at the corresponding neighbor frequencies  
192 with one frequency bin of spacing at each flank (i.e., baseline). The multi-harmonic SNR of the  
193 waveforms were computed by dividing the signal's amplitude by the baseline's amplitude.

#### 194 **EEG recordings**

195 EEG was continuously recorded during the whole duration of the trials and digitalized at a  
196 sampling rate of 1 kHz by a Neuroscan SynAmps RT amplifier (Neuroscan, Compumedics,  
197 Charlotte, NC, USA). For the EEG acquisition, 36 sintered electrodes mounted in a neoprene cap  
198 (Quick-Cap Neo-Net; Compumedics, Charlotte, NC, USA) at standard locations according to the  
199 extended 10-10 system were used. Electrooculograms (EOG) were measured with two bipolar in-  
200 cap electrodes placed above and below the right eye (VEOG), and two horizontal in-cap electrodes  
201 placed on the outer canthi of the eyes (HEOG). The ground electrode was located at AFz and the  
202 common reference electrode between Cz and Cpz. All impedances were kept below 10 k $\Omega$  during  
203 the whole recording session.

#### 204 **EEG data processing and analysis**

205 The data analysis was performed offline using the EEGLab v.2021.1 toolbox<sup>[34]</sup> and the Fieldtrip  
206 v.20211020 toolbox<sup>[33]</sup> running under Matlab v.2021a. For each participant, the continuous  
207 recordings were filtered from 0.5 Hz to 45 Hz with a Finite Impulse Response bandpass Kaiser  
208 filter to remove slow drifts and line noise, respectively. Excluding the bipolar montages, the  
209 filtered data were re-referenced to the average activity of all electrodes to remove any noise from  
210 the reference electrode. For each trial, the continuous recordings were segmented from -10 s to  
211 +60 s relative to the onset of the auditory stimuli. All epochs were merged to detect muscle artifacts  
212 based on a semi-automatic approach. First, all epochs were visually inspected with respect to their  
213 waveform morphology. Those epochs that included muscle artifacts<sup>[35]</sup>, characterized by high-  
214 frequency activity (> 20 Hz) and typically produced by muscular activity near the head, such as  
215 swallowing or moving the head, were rejected, unless the artifacts were due to eye movements.  
216 Then, independent component analysis (ICA) was computed to remove artifacts produced by eye  
217 blinks, eye movements, and heart activity from the EEG signal using the runica algorithm<sup>[36,37]</sup>.  
218 Deliberately removing activity in the EEG coming from the heart was critical because the tempo  
219 of the songs at 1.65 Hz partly matched the frequency of the human heart, ranging from 1 Hz to  
220 1.67 Hz. Lastly, epochs were baseline corrected by using the EEG activity over the 10 s windows  
221 prior to the onset of the songs. The electrodes relative to the vertical and horizontal EOGs were  
222 not further included in the analyses.

223 For each participant and trial, epochs lasting 58 s were sorted by segmenting the pre-processed  
224 recordings from +1 to +59 s relative to the onset of the auditory stimuli. Following the same  
225 procedure as in a previous study<sup>[38]</sup>, the first second of each epoch was removed: (1) to discard the  
226 transient auditory evoked potentials related to the onset of the stimulus<sup>[39-41]</sup>; (2) because steady-  
227 state evoke potentials require several cycles of stimulation to be steadily entrained<sup>[42]</sup>; and (3)

228 because several repetitions of the beat are required to elicit a steady perception of beat<sup>[43]</sup>.  
229 Additionally, by removing the first and last seconds of the recording, the fade-in and fade-out  
230 effects of the stimuli were excluded.

231 From this step onwards, data were analyzed in two independent strategies. First, to explore *global*  
232 measures of entrainment, the obtained 58-second-long epochs were transformed in the frequency  
233 domain by using Welch's method, computed over 10 s windows with a 90% overlap with a  
234 Hanning taper, as implemented in Fieldtrip's function 'mtmconvolv' (Fig. 3). This procedure  
235 yielded frequency spectrums with a 0.1 Hz frequency resolution. For each participant, song and  
236 electrode, the resulting frequency spectrums were averaged across trials. Global entrainment to  
237 each song was measured as a multi-harmonic SNR response, meaning that the measure of  
238 entrainment was not only limited to the spectral amplitude at the beat frequency. Rather,  
239 entrainment was assessed as a multi-harmonic response due to the non-sinusoidal beats of the  
240 songs and the nonlinear nature of the brain processes in response to acoustic onsets that might  
241 project the neural responses to the beat frequency onto higher harmonics of the beat  
242 frequency<sup>[44,45]</sup>.

243 To determine which harmonics to consider, the significance of each harmonic's spectral amplitude  
244 averaged across participants and electrodes was tested for each song. Specifically, we z-scored the  
245 group-level spectral amplitude at the frequency of each harmonic (i.e., signal), with a baseline  
246 defined as the corresponding neighboring bins with one frequency bin of spacing, using the  
247 formula  $z(\text{signal}) = (\text{signal} - \text{baseline mean}) / \text{baseline SD}$ . This testing process was carried out  
248 sequentially for each harmonic until one harmonic did not reach significance<sup>[46]</sup>. Using this test,  
249 the first and second harmonics were considered significant for songs 5 and 6, as they had z-scores  
250  $> 1.64$  (i.e.,  $p < 0.05$ , one-sample, one-tailed test; testing signal  $>$  noise). To prevent introducing

251 bias into the results, the same harmonics were employed for computing entrainment across all  
252 songs, namely the first and second harmonics. For each participant, song, and electrode we  
253 summed the spectral amplitudes at the beat, first harmonic, and second harmonic frequency bins  
254 (i.e., signal) and at the baseline bins<sup>[44]</sup>. Lastly, we computed the SNR between the signal and  
255 averaged baseline spectral amplitudes.

256 Considering previous findings indicating that the perception of beat is region-specific<sup>[22,23]</sup>, we  
257 examined the scalp-wide distribution of entrainment to identify and select electrodes that are  
258 pertinent to the observed entrainment patterns. To this aim, for each song and electrode we  
259 averaged the SNR measures across participants and plotted the scalp distribution (Fig. 3d). Upon  
260 a visual examination, a consistent fronto-central pattern of entrainment across songs was observed.  
261 Therefore, for each participant and song, we quantified global entrainment as a multi-harmonic  
262 SNR averaged across fronto-central channels (i.e., FC3, FCz, FC4, C3, Cz, and C4 according to  
263 the extended 10-10 standard system). These measures were subsequently normalized by the  
264 spectral amplitudes of the songs (see section 2.4. Sound pattern analysis). Lastly, to mitigate  
265 potential confound effects related to the idiosyncratic spectral characteristics of the songs, global  
266 entrainment was averaged for each participant between songs within tempos.

267 The second analytical strategy was related to exploring the temporal dynamics of neural  
268 entrainment for each participant and song. To this aim, the 58-second-long average epochs were  
269 split into 10 s windows with a 90% overlap and subsequently transformed into the frequency  
270 domain with a Hanning taper, as implemented in Fieldtrip's function 'mtmconvolv'. For each  
271 participant, song, electrode and window, the resulting frequency spectrums were averaged across  
272 trials, yielding frequency spectrums with a frequency resolution of 0.1 Hz. The deliberate decision  
273 of computing FFTs given windows of 10 s are justified by previous literature on entrainment using

274 similar short-lasting epochs<sup>[47,48]</sup>. Also, using overlapping sliding time windows is justified by the  
275 fact that we are conducting a fine-grained analysis of entrainment at specific frequencies<sup>[49]</sup>. The  
276 significant harmonics for computing entrainment as a multi-harmonic SNR response across time  
277 were determined to be the same as in the measurement of global entrainment, namely the first and  
278 second harmonics. For each participant, song, electrode and window we summed the spectral  
279 amplitudes at the beat, first harmonic, and second harmonic frequency bins (i.e., signal) and  
280 baseline bins<sup>[44]</sup> and computed the SNR. Subsequently, entrainment across time was quantified as  
281 the multi-harmonic SNR averaged across fronto-central channels (i.e., FC3, FCz, FC4, C3, Cz,  
282 and C4 according to the extended 10-10 standard system). These measures were normalized by the  
283 spectral amplitudes of the songs (see section 2.4. Sound pattern analysis). Lastly, entrainment was  
284 averaged for each participant and window between songs within tempos.

## 285 **Analysis of behavioral measures**

### 286 *Reaction time task*

287 Reaction time (RT) was measured as the time in seconds that participants took to respond to the  
288 offset of the songs. For each participant, RT was averaged across trials within songs to control for  
289 random variability in their performance. For each tempo, RT was averaged between songs to  
290 control for possible confound effects provoked by the idiosyncratic musical characteristics of the  
291 songs.

### 292 *Go/no-go task*

293 Participants' responses in the go/no-go task were classified in four types: (a) hits (HTs), if  
294 participants pressed the mouse when a go-stimulus was presented; (b) misses (MSs), if participants  
295 did not press the mouse when a go-stimulus was presented; (c) correct rejections (CRs), if  
296 participants did not press the mouse when a no-go stimulus was presented; and (d) false alarms

297 (FAs), if participants pressed the mouse when a no-go stimulus was presented. For each participant  
298 and trial, the proportion of each type of response was calculated by dividing the total number of  
299 those responses by the total number of trials within the go/no-go task. The proportions for each  
300 type of response were averaged across trials within the same song, and the mean punctuation for  
301 each type of response was obtained by calculating the mean across songs within each tempo.

### 302 *IID-ASC*

303 For each participant, trial and subscale (i.e., Disembodiment, Spiritual experience, and Experience  
304 of unity), the average score was computed across items. For each participant, the punctuations in  
305 each subscale were averaged across trials within songs. For each tempo, the scores in each subscale  
306 were averaged between songs.

## 307 **Results**

### 308 **Reaction time**

309 To explore differences in RT between tempos, a non-parametric Friedman test of differences  
310 among repeated measures was conducted. The results show no significant differences in RT  
311 between tempos ( $\chi^2_{(2)} = 2, p = 0.368$ ;  $M_{1.65} = 1.044, M_{2.25} = 1.208, M_{2.85} = 1.018$ ).

### 312 **Go/no-go task**

313 For each of the studied response types (HT, MS, CR and FA), and for each musical tempo, we  
314 performed a one-way non-parametric Friedman test of differences among repeated measures. The  
315 results show no significant differences between tempos in any response type (HT:  $\chi^2_{(2)} = 3.361, p$   
316  $= 0.186$ ;  $M_{1.65} = 0.723, M_{2.25} = 0.728, M_{2.85} = 0.725$ ; MS:  $\chi^2_{(2)} = 3.041, p = 0.219$ ;  $M_{1.65} = 0.023,$   
317  $M_{2.25} = 0.019, M_{2.85} = 0.022$ ; CR:  $\chi^2_{(2)} = 2.842, p = 0.241$ ;  $M_{1.65} = 0.206, M_{2.25} = 0.202, M_{2.85} =$   
318  $0.2$ ; FA:  $\chi^2_{(2)} = 2.842, p = 0.241$ ;  $M_{1.65} = 0.048, M_{2.25} = 0.051, M_{2.85} = 0.053$ ).

### 319 **IID-ASC**

320 For each subscale of the 11D-ASC (Disembodiment, Spiritual experience, and Experience of  
321 unity) and tempo, we conducted a one-way repeated measures Analysis of Variance to investigate  
322 differences in these scores between tempos. The results show a significant effect of tempo in  
323 Experience of unity ( $F_{(2, 36)} = 4.775$ ,  $p = 0.014$ ,  $\eta^2 = 0.016$ ). A post-hoc analysis using t-tests  
324 revealed a significant difference ( $t_{(18)} = -2.567$ ,  $p = 0.019$ ) between the tempos 1.65 Hz ( $M_{1.65} =$   
325 4.316) and 2.85 Hz ( $M_{2.85} = 3.646$ ; Fig. 4). No differences were found in the scores of  
326 Disembodiment ( $F_{(2, 36)} = 1.309$ ,  $p = 0.277$ ,  $\eta^2 = 0.000716$ ;  $M_{1.65} = 3.893$ ,  $M_{2.25} = 3.444$ ,  $M_{2.85} =$   
327 3.447) and Spiritual Experience ( $F_{(2, 36)} = 0.214$ ,  $p = 0.808$ ,  $\eta^2 = 0.008$ ;  $M_{1.65} = 2.579$ ,  $M_{2.25} = 2.62$   
328 ,  $M_{2.85} = 2.687$ ).

## 329 EEG

### 330 *Global entrainment*

331 A linear mixed model analysis was conducted by using the 'lmer' function from the lme4  
332 package<sup>[50]</sup> in Rstudio v.4.1.3 to explore the impact of tempo on global entrainment. The covariates  
333 "musical training" (indicating whether participants had any form of musical training or not) and  
334 "years of musical training" (representing the duration of musical training in years), as assessed  
335 with a musical questionnaire, were included in the analysis to control for any potential influence  
336 of participants' musical expertise on entrainment. The normality and dispersion of the residuals  
337 were checked. The model included the fixed effects of tempo (with three levels: 1.65, 2.25 and  
338 2.85 Hz), musical training (with two levels: yes or no), and years of musical training. Each  
339 participant's identification code was added as a random effect to account for the correlation among  
340 the repeated measurement from the same individual. Adding the covariates improved the fit of the  
341 model, as evidenced by a significant decrease of the Bayesian information criterion (BIC) in the  
342 model with covariates ( $BIC = -84.391$ ) compared to the model without covariates ( $BIC = -80.916$ ;

343  $\chi^2_{(4)} = 19.648$ ;  $p < 0.01$ ). The results of the linear mixed model with the main effect of tempo and  
344 the covariates about musical training are shown in Table 1.

345 To determine the significant comparisons of entrainment between tempos, Tukey's post-hoc tests  
346 with the Kenward-Roger degrees of freedom method were conducted by using the 'emmeans'  
347 function<sup>[51]</sup> in Rstudio v.4.1.3. Post-hoc contrasts revealed that entrainment was significantly  
348 greater for 1.65 Hz compared to 2.85 Hz ( $M_{1.65} = 1.067$ ;  $M_{2.85} = 0.990$ ;  $t_{(36)} = 3.546$ ;  $p = 0.003$ ; Fig.  
349 5). No other differences between conditions were found.

### 350 *Entrainment across time*

351 In order to assess the differences in the temporal dynamics of entrainment to the beat of songs at  
352 the different tempos<sup>48</sup> one-way repeated measures ANOVAs were conducted, one for each sliding  
353 window, with one factor (tempo) and three levels (1.65, 2.25 and 2.85 Hz). A significance level of  
354  $p = 0.01$  was implemented to account for the multiple ANOVAs and mitigate the risk of type I  
355 error. Depending on the window, post-hoc analyses were conducted using t-tests for normally  
356 distributed data or Wilcoxon signed-rank tests for non-normally distributed data. Bonferroni  
357 corrections were applied to account for multiple comparisons. The statistical results beyond the  
358 main effects are not reported due to the significant quantity of statistical analysis conducted.  
359 However, the last time point in which entrainment was measured, which served as the basis for  
360 correlational analyses between entrainment and RT and executive function, require further  
361 examination. Specifically, a significant effect of tempo was found on the last time point ( $\chi^2_{(2)} =$   
362  $9.789$ ,  $p = 0.007$ ). Post-hoc comparison tests revealed that entrainment was higher for songs at  
363 1.65 Hz compared to both 2.25 Hz ( $t_{(2)} = 163$ ,  $p = 0.010$ ) and 2.85 Hz ( $t_{(2)} = 165$ ,  $p = 0.010$ ). Fig.  
364 6 visually depicts the results of the main effects across all time points.

### 365 **Brain-behavior correlation analyses**



366 To explore whether the magnitude of entrainment is related to participants' performance in the  
367 objective behavioral measures, linear models were applied to the differences in RT, executive  
368 function and entrainment between each pair of tempos. Computing the correlations across  
369 differences aimed to uncover whether states in which the brain is highly synchronized to the beats  
370 of the songs vs. less synchronized is related to the variability in the participant's performance  
371 between the two conditions. The significance of the relationships was assessed by testing the  
372 significance of the slopes of the linear models. To this aim, only entrainment calculated from the  
373 last 10-second-long windows were used. This is because participants' performance in cognitive  
374 tasks can be expected to be affected by the brain configuration at the closest moment in time to the  
375 task. Also, as the percentage of CR and HT, and the percentage of MS and FS are complementary,  
376 correlations with entrainment were only computed for correct rejection and miss responses. The  
377 normality of the residuals for each linear model was assessed using Shapiro-Wilk's tests, revealing  
378 that all residuals exhibited a normal distribution. The analysis revealed a significant relationship  
379 between the differences in RT and entrainment between tempos 1.65 Hz and 2.25 Hz ( $B = 0.942$ ,  
380  $t_{(17)} = 2.276$ ,  $p = 0.027$ ,  $R^2 = 0.086$ ; Fig. 7a). Also, there was a significant relationship between the  
381 differences in CR and entrainment between tempos 1.65 Hz and 2.25 Hz ( $B = -0.018$ ,  $t_{(17)} = -2.196$ ,  
382  $p = 0.032$ ,  $R^2 = 0.081$ ; Fig. 7b) and between 1.65 Hz and 2.85 Hz ( $B = -0.010$ ,  $t_{(17)} = -2.118$ ,  $p =$   
383  $0.039$ ,  $R^2 = 0.075$ ; Fig. 7c). No other significant relationships were observed.

384 To investigate whether the magnitude of entrainment is associated with the subjective experience  
385 of participants while listening to the songs, linear models were applied to the differences in  
386 participants' scores in the 11D-ASC subscales and the differences in entrainment between each  
387 pair of tempos. In contrast to the objective measures, participant-reported measures of their

388 experience during the stimulation can be expected to be influenced by the overall level of  
389 entrainment. No significant relationships were found.

## 390 **Discussion**

391 The present study has revealed, using electroencephalography, a relationship between the  
392 magnitude of entrainment to the beat of electronic music and some aspects of cognition. In  
393 particular, we have shown that the strength of entrainment to the beat of 1-minute-long electronic  
394 music can be modulated by the tempo of the music. Our results show that entrainment is higher  
395 for stimulation rates at 1.65 Hz compared to faster rates of stimulation, namely 2.85 Hz, but not in  
396 comparison to 2.25 Hz. In examining the temporal dynamics of entrainment a similar pattern of  
397 results is observed throughout the time course of the songs. Notably, towards the end of the songs,  
398 entrainment to the stimulation at 1.65 Hz was higher compared to the other two beat frequencies.  
399 The observed neural differences between conditions allowed us to explore whether the magnitude  
400 of entrainment is related to differences in cognitive processes or subjective experiences related to  
401 altered states of consciousness (ASCs). Although the participants' reaction time, executive  
402 function, feelings of disembodiment, and spiritual experiences were not different depending on the  
403 tempo of the music they were exposed to, it was found that music at 1.65 Hz aroused more feelings  
404 of unity compared to music at 2.85 Hz. We did not observe any significant relationship between  
405 the magnitude of entrainment and participants' phenomenological experiences during listening to  
406 the songs. However, our findings revealed significant yet weak relationships between the  
407 magnitude of entrainment and both participants' reaction time and response inhibition.

408 Previous empirical evidence showed that entrainment is maximum for periodic auditory stimuli at  
409 a rate of 2 Hz within a range of frequencies from 1 to 10 Hz in steps of 1 Hz<sup>[29]</sup>. Our results align  
410 with and build upon these findings, having employed stimulus frequencies within a range from 1

411 to 3 Hz. Specifically, we found more entrainment for music with a beat frequency closer to 2 Hz,  
412 namely at 1.65 Hz, compared to music closer to 3 Hz, this is, at 2.85 Hz. We observed that this  
413 pattern remains consistent when considering the temporal dynamics of entrainment over the time  
414 course of the 60-s musical excerpts. Nevertheless, it is important to consider the large fluctuations  
415 in entrainment across time (Fig. 6). These fluctuations could be potentially attributed to stimulus  
416 properties, namely variations in the beat accent in the electronic music. However, we contend  
417 against this notion due to two main reasons. Firstly, the presence of the beats within the excerpts  
418 are quite consistent across time, as visually depicted in Fig. 3a. Secondly, two songs were added  
419 for each tempo to lower the effect of the idiosyncratic musical characteristics of each song on the  
420 measures of entrainment, attenuating the influence of beat-related stimulus properties. It remains  
421 unclear why entrainment to beat frequencies of 2.25 Hz, which is closer to 2 Hz compared to 1.65  
422 Hz, do not exhibit the highest level of entrainment across the tempos used in the study. The  
423 predominantly fronto-central scalp distribution of entrainment also aligns with previous  
424 findings<sup>[52]</sup>. This pattern can be attributed to the proximity of fronto-central channels to neural  
425 generators involved in sensorimotor processing, such as the sensorimotor cortex, and the  
426 supplementary motor area, as well as the auditory system.

427 Given that entrainment is modulated by the tempo of music, we suggest that complex brain  
428 mechanisms might be tuning entrainment, most probably in favor of brain function<sup>[19,20]</sup>. The  
429 stimulation frequency of 1.65 Hz partially matches the human optimal rate for sensorimotor  
430 behavior<sup>[53-56]</sup>. Previous research discussing this match has proposed the existence of a brain  
431 mechanism facilitating auditory-motor behavior through entrainment when being presented with  
432 auditory stimuli at rates around 2 Hz<sup>[29]</sup> that could also explain part of our results. However, the  
433 likelihood of small unintentional body movements while participants were listening to the music

434 cannot be discounted. Body movement may account for the differences in entrainment between  
435 tempos, as such movement might be amplified for the songs at the tempo closer to 2 Hz. Upcoming  
436 studies should monitor small body movements, especially head movement, during music listening  
437 when exploring entrainment.

438 To the best of our knowledge, no previous studies had explored how the rate of repetitive auditory  
439 stimuli might modulate ASCs' characteristics. Here, we measured proxies of ASCs both in terms  
440 of cognitive function (i.e., reaction time and executive function) and in terms of subjective  
441 experience (i.e., by using three subscales of the 11D-ASC)<sup>[28]</sup> while listening to the music at  
442 different tempos. We found that the tempo of electronic music did not affect participants' overall  
443 reaction time or executive capacities. Similarly, participants' experience of unity and feelings of  
444 disembodiment did not change depending on the tempo of the music. These results suggest that  
445 the presentation rate of repetitive stimuli does not affect differently these aspects of cognitive  
446 function and human experience. Noteworthy, these results do not indicate whether cognition and  
447 human experience are altered under the conditions participants were in, as only the rate of  
448 stimulation is being accounted for. However, participants felt more experiences of unity for the  
449 music at 1.65 Hz compared to the music at 2.85 Hz, mirroring the entrainment findings and  
450 suggesting a potential brain-behavior relationship. One limitation of the study is the potential  
451 impact of the course of the experimental procedure on the participants' phenomenological ratings.  
452 Specifically, possible confound effects on the phenomenological experiences reported might rise  
453 from having participants conducting the go/no-go task in between listening to the music extracts  
454 and filling out the retrospective 11D-ASC questionnaire.

455 In previous literature on ASCs, the usage of repetitive stimulation to trigger altered mental states<sup>[7-  
456 9,14,15]</sup> has been explained by entrainment<sup>[17]</sup>, but with no direct evidence to support that claim.

457 Critically, for the first time this study has explored a relationship between the magnitude of  
458 entrainment and ASCs. We found three weak, yet significant, brain-behavior associations. Given  
459 the modest strength of these relationships, caution should be exercised in interpreting the results  
460 and further investigation is warranted to elucidate potential underlying mechanisms. To explore  
461 these associations, the neural metric employed was entrainment observed during the final 10  
462 seconds of stimulation, which was higher for songs at 1.65 Hz compared to both songs at 2.25 Hz  
463 and 2.85 Hz. First, we found that the more differences in entrainment between songs at 1.65 Hz  
464 and 2.25 Hz, the more differences in participants' reaction time to the offset of these songs. In our  
465 study, reaction time was used as a measure related to the level of absorption to the music, indicating  
466 participants' cognitive responsiveness and engagement with the auditory stimuli. Because  
467 rhythmically-induced ASCs are characterized by a selective focus on environmental stimuli<sup>[11]</sup>,  
468 reaction time to the offset of the songs is a potential proxy of ASCs. While entrainment was higher  
469 for songs at 1.65 Hz compared to songs at 2.25 Hz, the differences in reaction time between these  
470 tempos did not exhibit a consistent trend among participants. This is evidenced by the null  
471 differences in reaction time across tempos. Also, Fig. 7 shows that differences in reaction time  
472 between songs at 1.65 Hz and songs at 2.25 Hz are distributed above and below zero. In other  
473 words, our results show that higher levels of neural synchronization are related to both faster and  
474 slower reaction times, depending on the participant. These findings invite further investigation into  
475 the relationship among entrainment, reaction times, and personality traits and/or individual  
476 cognitive characteristics. One such significant trait could be musical training, as it was significant  
477 in explaining a portion of the observed variance in the strength of entrainment across conditions.  
478 However, the limited representation of participants with musical training within our sample  
479 precluded a comprehensive investigation into its potential influence on the observed associations.

480 Additional brain-behavior associations revealed that the more differences in entrainment  
481 participants showed between tempos 1.65 Hz and 2.25 Hz, the more similar participants' inhibition  
482 responses between the two conditions were. The same pattern was found between tempos 1.65 Hz  
483 and 2.85 Hz. The inhibition responses were measured as participants' correct rejections in the  
484 go/no-go task performed after listening to the musical extracts. Empirical evidence suggests that  
485 the inhibition response relies on neural activity involving the pre-supplementary motor area<sup>[57]</sup>.  
486 Also, previous research has shown persistent effects of oscillatory entrainment on cognition<sup>[58]</sup>. In  
487 our study, the fronto-central scalp distribution of entrainment observed during listening to the  
488 songs suggest that motor areas, including the supplementary motor area, might be recruited.  
489 Therefore, it is a possibility that a higher strength of entrainment in motor areas during listening  
490 to the songs might decrease neural variability during correct rejection responses in the go/no-go  
491 task, resulting in fewer differences in participants' inhibition response. While this holds  
492 physiological interest, its significance in relation to the hypothesized correlation between  
493 entrainment and ASCs appears limited. Nevertheless, it does imply that repetitive stimulation  
494 effectively entrains regions associated with inhibitory responses, potentially influencing related  
495 behavioral outcomes. Consequently, future investigations should delve into the potential  
496 correlation between entrainment, inhibitory responses, and ASCs.

## 497 **Conclusions**

498 To our knowledge, this is the first report of a relationship between entrainment and ASCs, although  
499 this relationship has been suggested in previous literature. In summary, this article has argued that  
500 entrainment and the phenomenological aspects of ASCs induced by repetitive stimuli are related.  
501 Our results showing that entrainment is higher for stimulation rates at 1.65 Hz are broadly  
502 consistent with previous findings. We found an association between entrainment and absorption

503 to the music, as measured with participants' reaction times to the offset of the stimulation.  
504 Specifically, we observed that the more the strength of participants' entrainment to the music, as  
505 measured by differences in entrainment between songs at 1.65 Hz and 2.25 Hz, the more  
506 differences in participants' reaction time to the offset of these songs. While entrainment was higher  
507 for songs at 1.65 Hz compared to 2.25 Hz, reaction time was the same across tempos. Therefore,  
508 we suggest that individual personality or cognitive traits might be modulating whether the strength  
509 of entrainment is related to more or less time to respond and, subsequently, to whether participants  
510 are more or less absorbed by the songs. Although musical training emerged as a significant factor  
511 explaining variance in the magnitude of entrainment, the small subset of participants with musical  
512 training in our sample limits deeper exploration of its impact on this brain-behavior association.  
513 Additionally, given the weak strength of this relationship, caution is advised when interpreting  
514 these findings.

### 515 **Data availability**

516 The data and analysis code will be publicly available here upon publication (<https://osf.io/nkzcg/>).

### 517 **References**

- 518 1. St John, G. Liminal being: Electronic dance music cultures, ritualization and the case of  
519 psytrance in *The Sage Handbook of Popular Music* (eds. Bennet, A. & Waksman, S.)  
520 243–260 (Sage, 2015).
- 521 2. Tramacchi, D. Field tripping: psychedelic communitas and ritual in the Australian Bush.  
522 *Journal of Contemporary Religion* **15**, 201–213 (2000).

- 523 3. Newson, M., Khurana, R., Cazorla, F. & van Mulukom, V. ‘I get high with a little help  
524 from my friends’ - how raves can invoke identity fusion and lasting co-operation via  
525 transformative experiences. *Front Psychol* **12**, (2021).
- 526 4. Hood, R. W. J. Methodological issues in the use of psychedelics in religious rituals in  
527 *Seeking the Sacred With Psychoactive Substances: Chemical Paths to Spirituality and to*  
528 *God: History and Practices; Insights, Arguments and Controversies* (ed. Ellens, J. H.)  
529 395–410 (Bloomsbury, 2014).
- 530 5. Nencini, P. The shaman and the rave party: social pharmacology of ecstasy. *Subst Use*  
531 *Misuse* **37**, 923–939 (2002).
- 532 6. Gingras, B., Pohler, G. & Fitch, W. T. Exploring shamanic journeying: repetitive  
533 drumming with shamanic instructions induces specific subjective experiences but no  
534 larger cortisol decrease than instrumental meditation music. *PLoS One* **9**, e102103 (2014).
- 535 7. Kjellgren, A. & Eriksson, A. Altered states during shamanic drumming: a  
536 phenomenological study. *International Journal of Transpersonal Studies* **29**, 1–10 (2010).
- 537 8. Szabó, C. The effects of listening to monotonous drumming on subjective experiences in  
538 *Music and Altered States* (eds. Aldridge, D. & Fachner, J.) 51–59 (Kingsley, 2006).
- 539 9. Walker, M. Music as knowledge in shamanism and other healing traditions of siberia.  
540 *Arctic Anthropol* **40**, 40–48 (2003).
- 541 10. Goodman, F. D. *Where The Spirits Ride The Wind: Trance Journeys And Other Ecstatic*  
542 *Experiences*. (Indiana University Press, 1990).
- 543 11. American Psychiatric Association. *Diagnostic And Statistical Manual Of Mental*  
544 *Disorders*. (American Psychiatric Publishing, 1994).



- 545 12. Hutson, S. R. Technoshamanism: spiritual healing in the rave subculture. *Popular Music*  
546 *and Society* **23**, 53–77 (1999).
- 547 13. Schäfer, T., Fachner, J. & Smukalla, M. Changes in the representation of space and time  
548 while listening to music. *Front Psychol* **4**, 51929 (2013).
- 549 14. 15. Harner, M. *The Way Of The Shaman*. (Harper & Row, 1990).
- 550 15. Krippner, S. The epistemology and technologies of shamanic states of consciousness.  
551 *Journal of Consciousness Studies* **11–12**, 93–118 (2000).
- 552 16. Winkelman, M. A paradigm for understanding altered consciousness: the integrative mode  
553 of consciousness in *Altering Consciousness Multidisciplinary Perspectives* (eds. Cardeña,  
554 E. & Winkelman, M.) 23–41 (Praeger, 2011).
- 555 17. Vaitl, D. *et al.* Psychobiology of altered states of consciousness. *Psychol Bull* **131**, 98–127  
556 (2005).
- 557 18. Large, E. W. Resonating to musical rhythm: theory and experiment in *Psychology of time*  
558 (ed. Grondin, S.) 189–232 (Emerald Group, 2008).
- 559 19. Bittman, E. L. Entrainment is NOT synchronization: an important distinction and its  
560 implications. *J Biol Rhythms* **36**, 196–199 (2021).
- 561 20. Lakatos, P., Karmos, G., Mehta, A. D., Ulbert, I. & Schroeder, C. E. Entrainment of  
562 neuronal oscillations as a mechanism of attentional selection. *Science (1979)* **320**, 110–  
563 113 (2008).
- 564 21. Zoefel, B., ten Oever, S. & Sack, A. T. The involvement of endogenous neural oscillations  
565 in the processing of rhythmic input: more than a regular repetition of evoked neural  
566 responses. *Front Neurosci* **12**, (2018).

- 567 22. Chen, J. L., Penhune, V. B. & Zatorre, R. J. Listening to musical rhythms recruits motor  
568 regions of the brain. *Cerebral Cortex* **18**, 2844–2854 (2008).
- 569 23. Grahn, J. A. & Brett, M. Rhythm and beat perception in motor areas of the brain. *J Cogn*  
570 *Neurosci* **19**, 893–906 (2007).
- 571 24. Gosseries, O. *et al.* Behavioural and brain responses in cognitive trance: A TMS-EEG  
572 case study. *Clinical Neurophysiology* **131**, 586–588 (2020).
- 573 25. Hove, M. J. *et al.* Brain network reconfiguration and perceptual decoupling during an  
574 absorptive state of consciousness. *Cerebral Cortex* **26**, 3116–3124 (2016).
- 575 26. Kawai, N., Honda, M., Nishina, E., Yagi, R. & Oohashi, T. Electroencephalogram  
576 characteristics during possession trances in healthy individuals. *Neuroreport* **28**, 949–955  
577 (2017).
- 578 27. Oohashi, T. *et al.* Electroencephalographic measurement of possession trance in the field.  
579 *Clinical Neurophysiology* **113**, 435–445 (2002).
- 580 28. Studerus, E., Gamma, A. & Vollenweider, F. X. Psychometric evaluation of the altered  
581 states of consciousness rating scale (OAV). *PLoS One* **5**, (2010).
- 582 29. Will, U. & Berg, E. Brain wave synchronization and entrainment to periodic acoustic  
583 stimuli. *Neurosci Lett* **424**, 55–60 (2007).
- 584 30. Sevenius Nilsen, A. E., Juel, B. E., Farnes, N., Romundstad, L. & Storm, J. F. Behavioral  
585 effects of sub-anesthetic ketamine in a go/no-go task. *J Psychedelic Stud* **4**, 156–162  
586 (2020).
- 587 31. Young, M. E., Sutherland, S. C. & McCoy, A. W. Optimal go/no-go ratios to maximize  
588 false alarms. *Behav Res Methods* **50**, 1020–1029 (2018).

- 589 32. López-Mochales, S., Aparicio-Terrés, R., Díaz-Andreu, M. & Escera, C. Acoustic  
590 perception and emotion evocation by rock art soundscapes of Altai (Russia). *Front*  
591 *Psychol* **14**, (2023).
- 592 33. Oostenveld, R., Fries, P., Maris, E. & Schoffelen, J. M. FieldTrip: Open source software  
593 for advanced analysis of MEG, EEG, and invasive electrophysiological data. *Comput*  
594 *Intell Neurosci* **2011**, (2011).
- 595 34. Delorme, A. & Makeig, S. EEGLAB: an open source toolbox for analysis of single-trial  
596 EEG dynamics including independent component analysis. *J Neurosci Methods* **134**, 9–21  
597 (2004).
- 598 35. Goncharova, I. I., McFarland, D. J., Vaughan, T. M. & Wolpaw, J. R. EMG contamination  
599 of EEG: spectral and topographical characteristics. *Clinical Neurophysiology* **114**, 1580–  
600 1593 (2003).
- 601 36. Bell, A. J. & Sejnowski, T. J. An information-maximization approach to blind separation  
602 and blind deconvolution. *Neural Comput* **7**, 1129–1159 (1995).
- 603 37. Makeig, S., Jung, T. P., Bell, A. J., Ghahremani, D. & Sejnowski, T. J. Blind separation of  
604 auditory event-related brain responses into independent components. *Proc Natl Acad Sci*  
605 *U S A* **94**, 10979–10984 (1997).
- 606 38. Nozaradan, S., Peretz, I. & Mouraux, A. Selective neuronal entrainment to the beat and  
607 meter embedded in a musical rhythm. *Journal of Neuroscience* **32**, 17572–17581 (2012).
- 608 39. Saupe, K., Schröger, E., Andersen, S. K. & Müller, M. M. Neural mechanisms of  
609 intermodal sustained selective attention with concurrently presented auditory and visual  
610 stimuli. *Front Hum Neurosci* **3**, 688 (2009).

- 611 40. Nozaradan, S., Peretz, I., Missal, M. & Mouraux, A. Tagging the neuronal entrainment to  
612 beat and meter. *Journal of Neuroscience* **31**, 10234–10240 (2011).
- 613 41. Nozaradan, S., Peretz, I. & Mouraux, A. Steady-state evoked potentials as an index of  
614 multisensory temporal binding. *Neuroimage* **60**, 21–28 (2012).
- 615 42. 43. Regan, D. Human brain electrophysiology: evoked potentials and evoked magnetic  
616 fields in science and medicine. *Elsevier*. (1989).
- 617 43. Repp, B. H. Sensorimotor synchronization: A review of the tapping literature. *Psychon*  
618 *Bull Rev* **12**, 969–992 (2005).
- 619 44. Retter, T. L., Rossion, B. & Schiltz, C. Harmonic amplitude summation for frequency-  
620 tagging analysis. *J Cogn Neurosci* **33**, 2372–2393 (2021).
- 621 45. Zhou, H., Melloni, L., Poeppel, D. & Ding, N. Interpretations of frequency domain  
622 analyses of neural entrainment: periodicity, fundamental frequency, and harmonics. *Front*  
623 *Hum Neurosci* **10**, (2016).
- 624 46. Lenc, T., Keller, P. E., Varlet, M. & Nozaradan, S. Neural tracking of the musical beat is  
625 enhanced by low-frequency sounds. *Proc Natl Acad Sci U S A* **115**, 8221–8226 (2018).
- 626 47. Okawa, H., Suefusa, K. & Tanaka, T. Neural entrainment to auditory imagery of rhythms.  
627 *Front Hum Neurosci* **11**, (2017).
- 628 48. Tal, I. *et al.* Neural entrainment to the beat: the “missing-pulse” phenomenon. *Journal of*  
629 *Neuroscience* **37**, 6331–6341 (2017).
- 630 49. Batterink, L. J. & Choi, D. Optimizing steady-state responses to index statistical learning:  
631 Response to Benjamin and colleagues. *Cortex* **142**, 379–388 (2021).
- 632 50. Bates, D., Mächler, M., Bolker, B. M. & Walker, S. C. Fitting linear mixed-effects models  
633 using lme4. *J Stat Softw* **67**, (2014).

- 634 51. Lenth, R. Emmeans: Estimated marginal means, aka least-squares means. R package  
635 version 1.4.2. Preprint at (2019).
- 636 52. Tierney, A. & Kraus, N. Neural entrainment to the rhythmic structure of music. *J Cogn*  
637 *Neurosci* **27**, 400–408 (2015).
- 638 53. Drake, C., Jones, M. R. & Baruch, C. The development of rhythmic attending in auditory  
639 sequences: attunement, referent period, focal attending. *Cognition* **77**, 251–288 (2000).
- 640 54. Large, E. W. & Jones, M. R. The dynamics of attending: how people track time-varying  
641 events. *Psychol Rev* **106**, 119–159 (1999).
- 642 55. McAuley, J. D. & Jones, M. R. Modeling effects of rhythmic context on perceived  
643 duration: a comparison of interval and entrainment approaches to short-interval timing. *J*  
644 *Exp Psychol Hum Percept Perform* **29**, 1102–1125 (2003).
- 645 56. van Noorden, L. & Moelants, D. Resonance in the perception of musical pulse. *Int J*  
646 *Phytoremediation* **21**, 43–66 (1999).
- 647 57. Sánchez-Carmona, A. J., Santaniello, G., Capilla, A., Hinojosa, J. A. & Albert, J.  
648 Oscillatory brain mechanisms supporting response cancellation in selective stopping  
649 strategies. *Neuroimage* **197**, 295–305 (2019).
- 650 58. Roberts, B. M., Clarke, A., Addante, R. J. & Ranganath, C. Entrainment enhances theta  
651 oscillations and improves episodic memory. *Cogn Neurosci* **9**, 181–193 (2018).

## 652 **Authors contributions**

653 **RAT**: Conceptualization, Methodology, Software, Formal analysis, Investigation, Data curation,  
654 Writing – original draft, Writing – review & editing, Visualization, Supervision, Project  
655 administration. **SLM**: Conceptualization, Methodology, Writing – review & editing. **MDA**:  
656 Conceptualization, Writing – review & editing, Supervision, Project administration, Funding

657 acquisition. **CE:** Conceptualization, Methodology, Writing – review & editing, Supervision,  
658 Project administration, Funding acquisition.

## 659 **Funding**

660 This article is part of the ERC Artsoundscapes project (Grant Agreement No. 787842, PI: MDA)  
661 that has received funding from the European Research Council (ERC) under the European Union’s  
662 Horizon 2020 research and innovation programme. CE was also supported by the Generalitat de  
663 Catalunya SGR2017-974, María de Maeztu Unit of Excellence (Institute of Neurosciences,  
664 University of Barcelona) MDM 2017s0729, Ministry of Science, Innovation and Universities, and  
665 the ICREA Acadèmia Distinguished Professorship Award.

## 666 **Additional information**

### 667 **Competing interests**

668 The authors declare no competing interest.

### 669 **Figures and tables**

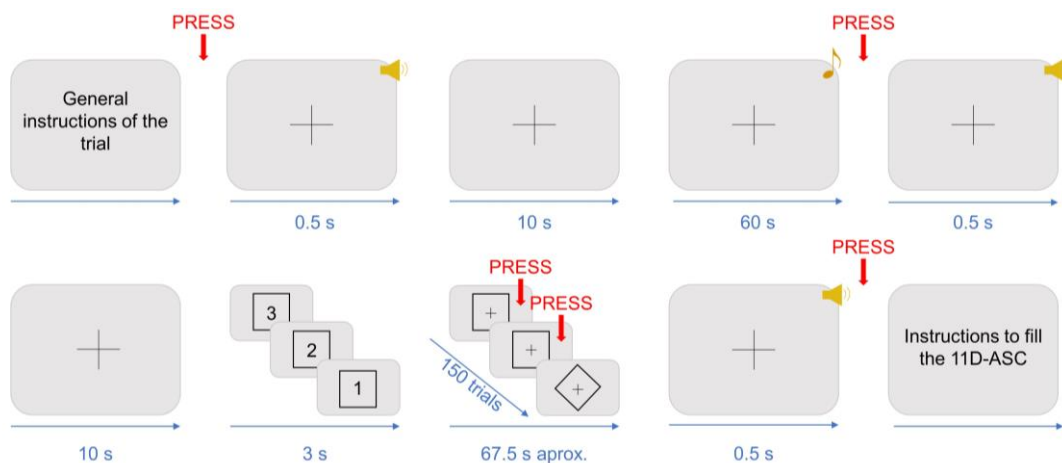

670 **Figure 1.** Schematic representation of the experimental design. The figure shows  
671 the sequence of motor responses (in red), auditory stimuli (in yellow), and visual  
672 stimuli (in black) that participants produced or were presented with during each  
673 trial. The timing constraints (in blue) are represented in seconds.  
674

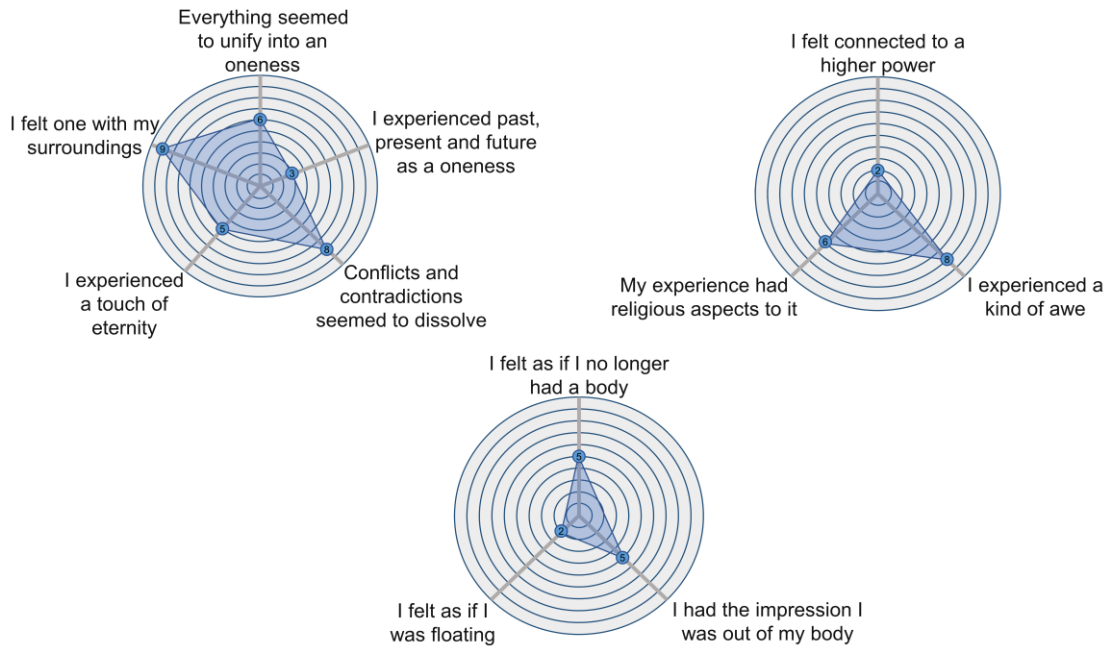

675

676

677

678

679

**Figure 2.** Customizable spider charts used to obtain ratings for the subscales of the 11D-ASC questionnaire. Each spider chart represents a subscale, with as many radii as items. The spider charts were displayed on a touch-sensitive tablet, where participants filled in the subscales by drawing their finger.

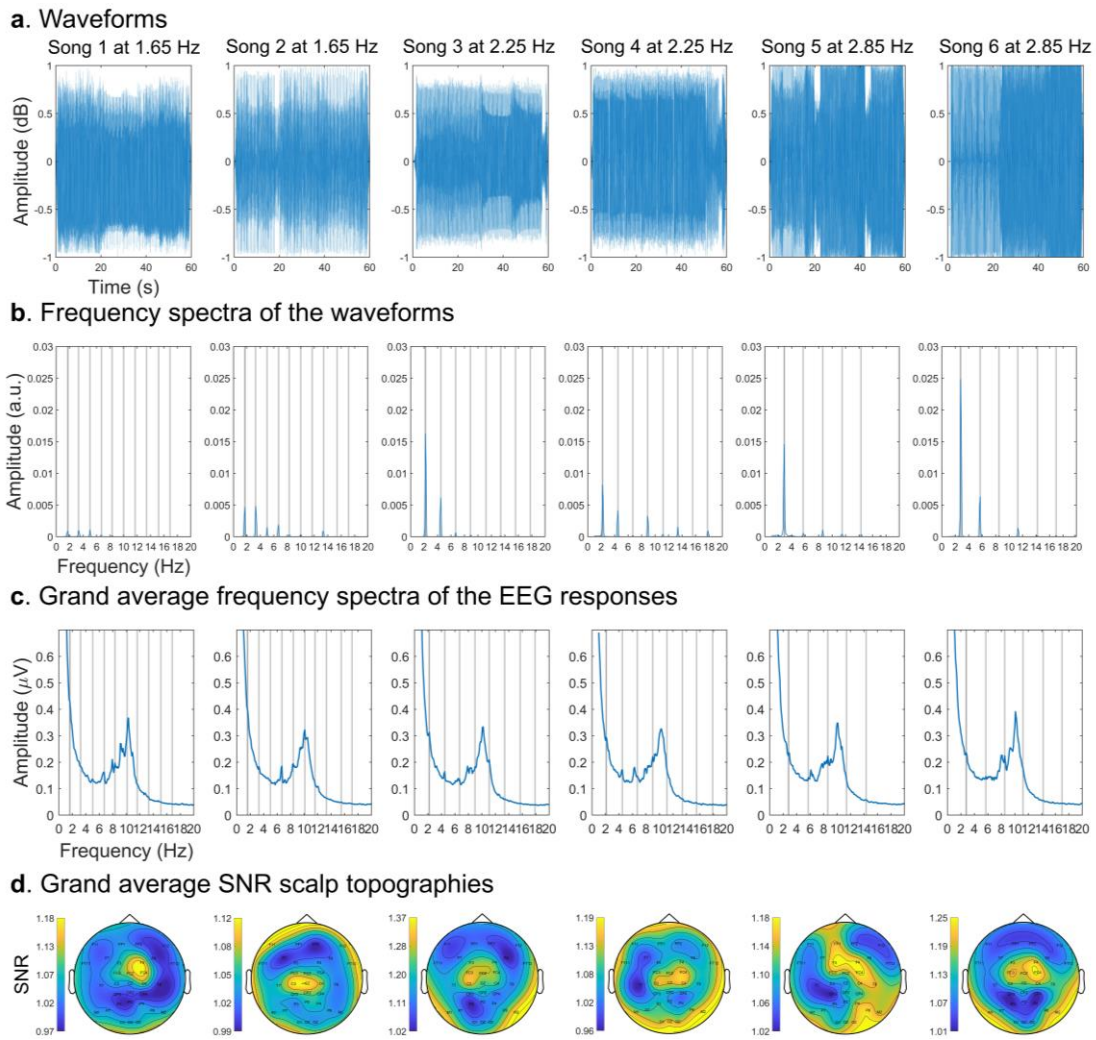

680

681

682

683

684

685

**Figure 3.** Sound patterns and frequency and spatial representations of the neural responses. **(a)** Waveforms of each song. **(b)** Spectral amplitude of the waveforms. **(c)** Spectral amplitude of the grand average EEG responses to each song. Gray vertical lines represent the beat frequency and harmonics lower than 20 Hz. **(d)** Scalp topographies of the grand average multi-harmonic SNRs.



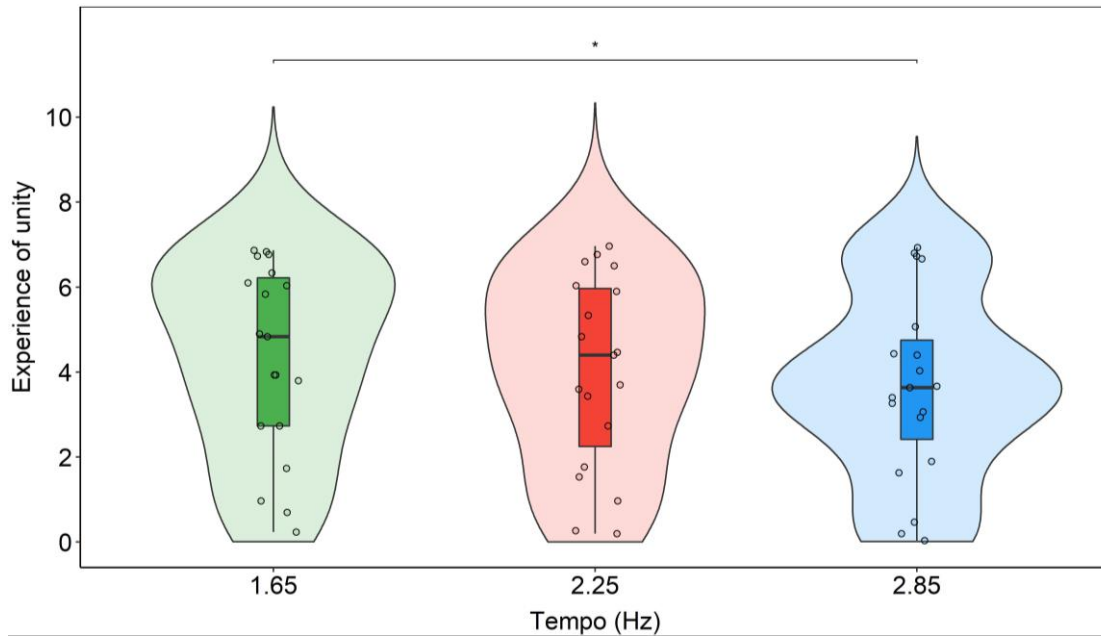

686  
687  
688  
689

**Figure 4.** Violin plots showing participants' scores in the subscale Experience of unity for each tempo condition. Individual data points for each condition are displayed as circular markers. \* indicates a p-value lower than 0.05.

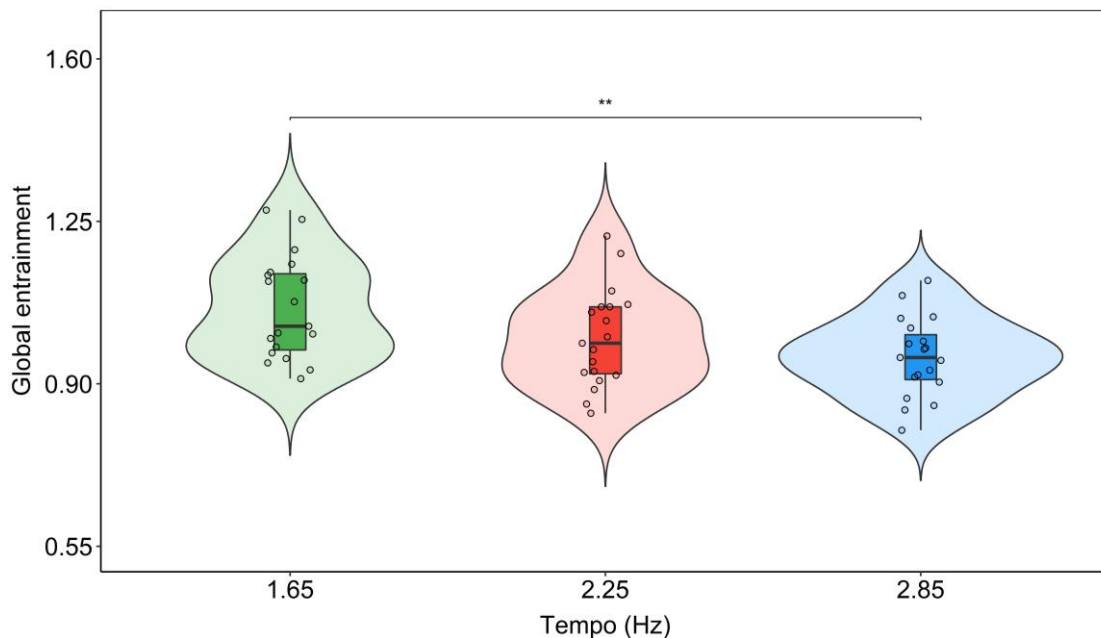

690  
691  
692  
693  
694

**Figure 5.** Violin plots showing entrainment to each tempo condition. Entrainment is shown as a multi-harmonic signal-to-noise ratio response normalized by the spectral variations in the musical extracts. Individual data points for each condition are displayed as circular markers. \*\* indicates a p-value lower than 0.01.

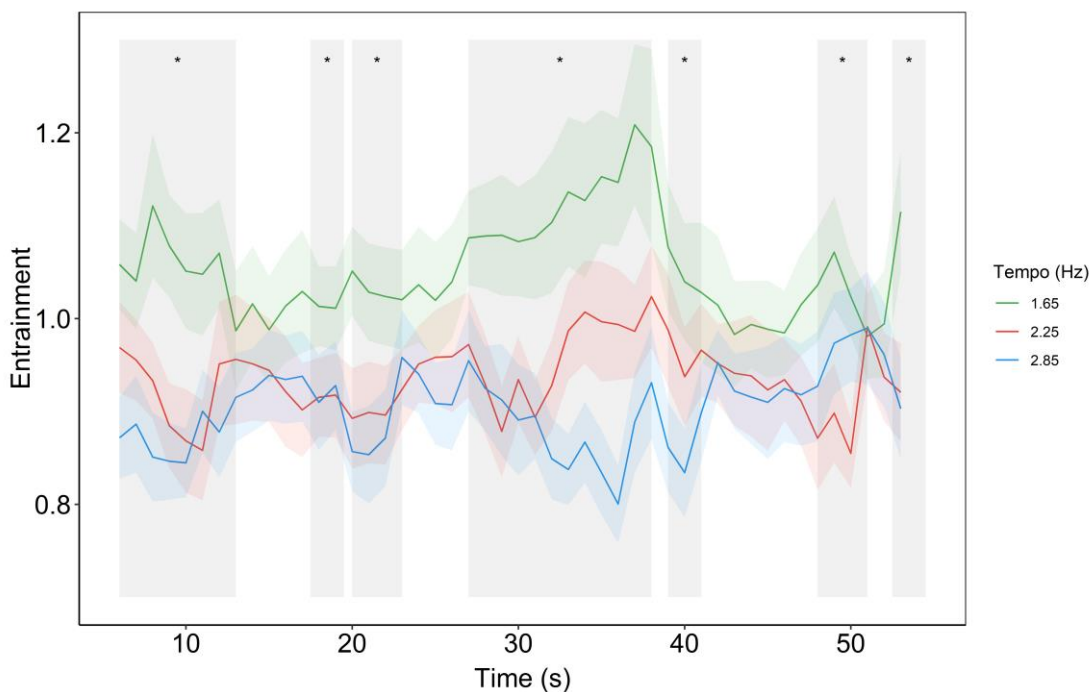

695  
696  
697  
698  
699

**Figure 6.** Time-series of entrainment to each tempo condition. Entrainment is shown as a multi-harmonic signal-to-noise ratio response normalized by the spectral variations in the musical extracts. Gray shaded windows represent significant main effects of tempo. \* indicates p-value lower than 0.01.

700

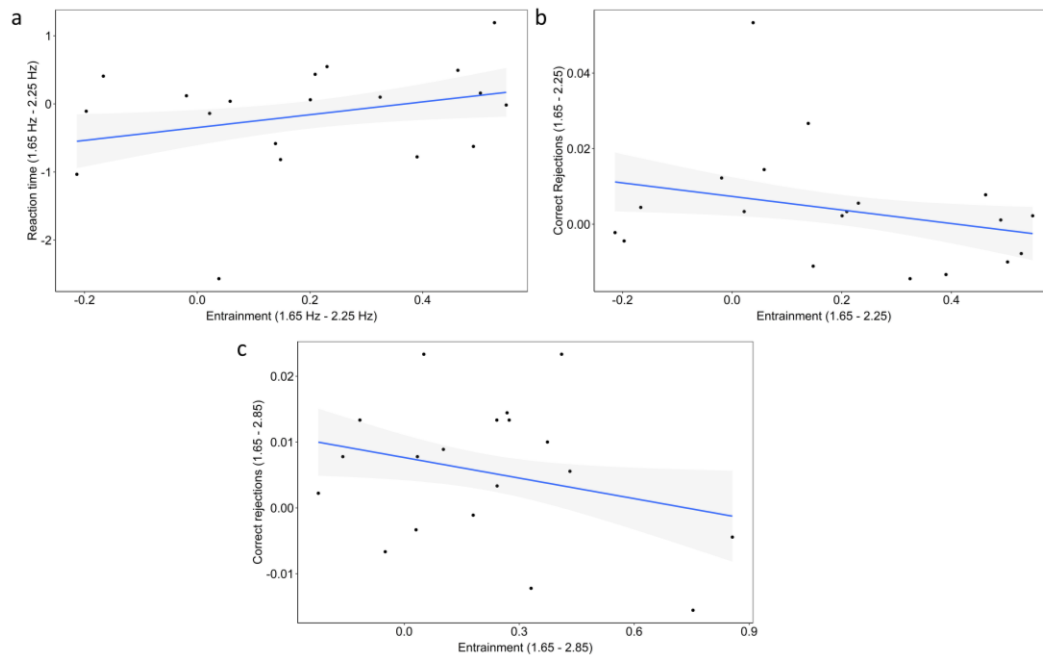

701  
702 **Figure 7.** Brain-behavior significant correlations. Relationship between (a) the  
703 difference in RT and the difference in entrainment between tempos 1.65 Hz and  
704 2.25 Hz, (b) the difference in CR and the difference in entrainment between  
705 tempos 1.65 Hz and 2.25 Hz, and (c) the difference in CR and the difference in entrainment  
706 between tempos 1.65 Hz and 2.85 Hz. The regression lines representing the  
707 relationships are represented by solid lines, while the shaded areas depict the  
708 confidence ranges for each regression at their respective tempos.

|                           | Coef $\beta$ | SE    | t      | 95% CI          | p           |
|---------------------------|--------------|-------|--------|-----------------|-------------|
| Intercept                 | 1.052        | 0.023 | 44.865 | [1.008 1.096]   | < 0.001 *** |
| Tempo (1.65 Hz – 2.25 Hz) | -0.065       | 0.030 | -2.182 | [-0.123 -0.007] | 0.036 *     |
| Tempo (1.65 Hz – 2.85 Hz) | -0.106       | 0.030 | -3.546 | [-0.164 -0.048] | 0.001 **    |
| Musical Training          | -0.040       | 0.040 | -1.007 | [-0.116 0.036]  | 0.329       |
| Years of Musical Training | 0.0128       | 0.005 | 2.644  | [0.003 0.022]   | 0.018 **    |

709 **Table 1.** Results of the mixed effect model including the main effect of tempo, musical  
710 training and years of musical training. Participant identification codes were added as a  
711 random effect. Coefficient comparisons for main effects are given as entrainment to 1.65  
712 Hz vs. 2.25 Hz and entrainment to 1.65 Hz vs. 2.85 Hz. \* indicates significance level.  
713
